# Supplementary material for: Transcriptomic analysis of genes related to alkaloid biosynthesis and the regulation mechanism under precursor and methyl jasmonate treatment in Dendrobium officinale
Source: Front Plant Sci. 2022 Jul 22;13:941231. doi: 10.3389/fpls.2022.941231 (PMC9355482; doi:10.3389/fpls.2022.941231)
Supplement: Supplementary file 6 [file Table_2.XLS]

## Sheet: Sheet1
Supplementary Table 2. The KEGG annonation information of unigenes in D. officinale PLBs.
No. and classification	KEGG pathway	Gene number and proportion	ko ID
Cellular processes
Transport and catabolism
1	Endocytosis	174 (3.63%)	ko04144
2	Peroxisome	95 (1.98%)	ko00564
3	Phagosome	80 (1.67%)	ko04145
Environmental information processing
Membrane transport
4	ABC transporters	36 (0.75%)	ko02010
Signal transduction
5	Phosphatidylinositol signaling system	67 (1.40%)	ko04070
6	Plant hormone signal transduction	231 (4.83%)	ko04075
Genetic information processing
Folding, sorting and degradation
7	Proteasome	53 (1.11%)	ko03050
8	Protein export	57 (1.19%)	ko03060
9	Protein processing in endoplasmic reticulum	226 (4.72%)	ko04141
10	RNA degradation	134 (2.80%)	ko03018
11	SNARE interactions in vesicular transport	39 (0.81%)	ko04130
12	Sulfur relay system	13 (0.27%)	ko04122
13	Ubiquitin mediated proteolysis	127 (2.65%)	ko04120
Replication and repair
14	Base excision repair	40 (0.84%)	ko03410
15	DNA replication	62 (1.30%)	ko03030
16	Homologous recombination	61 (1.27%)	ko03440
17	Mismatch repair	51 (1.07%)	ko03430
18	Non-homologous end-joining	9 (0.19%)	ko03450
19	Nucleotide excision repair	69 (1.44%)	ko03420
Transcription
20	Basal transcription factors	44 (0.92%)	ko03022
21	RNA polymerase	67 (1.40%)	ko03020
22	Spliceosome	209 (4.37%)	ko03040
Translation
23	Aminoacyl-tRNA biosynthesis	68 (1.42%)	ko00970
24	RNA transport	192 (4.01%)	ko03013
25	Ribosome	339 (7.08%)	ko03010
26	Ribosome biogenesis in eukaryotes	98 (2.05%)	ko03008
27	mRNA surveillance pathway	126 (2.63%)	ko03015
Metabolism
Amino acid metabolism
28	Alanine, aspartate and glutamate metabolism	49 (1.02%)	ko00250
29	Arginine and proline metabolism	56 (1.17%)	ko00330
30	Arginine biosynthesis	41 (0.86%)	ko00220
31	Cysteine and methionine metabolism	82 (1.71%)	ko00270
32	Glycine, serine and threonine metabolism	66 (1.38%)	ko00260
33	Histidine metabolism	19 (0.40%)	ko00340
34	Lysine biosynthesis	17 (0.36%)	ko00300
35	Lysine degradation	32 (0.67%)	ko00310
36	Phenylalanine metabolism	56 (1.17%)	ko00360
37	Phenylalanine, tyrosine and tryptophan biosynthesis	45 (0.94%)	ko00400
38	Tryptophan metabolism	37 (0.77%)	ko00380
39	Tyrosine metabolism	55 (1.15%)	ko00350
40	Valine, leucine and isoleucine biosynthesis	21 (0.44%)	ko00290
41	Valine, leucine and isoleucine degradation	52 (1.09%)	ko00280
Biosynthesis of other secondary metabolites
42	Caffeine metabolism	5 (0.10%)	ko00232
43	Flavone and flavonol biosynthesis	7 (0.15%)	ko00944
44	Flavonoid biosynthesis	49 (1.02%)	ko00941
45	Isoquinoline alkaloid biosynthesis	25 (0.52%)	ko00950
46	Monobactam biosynthesis	13 (0.27%)	ko00261
47	Phenylpropanoid biosynthesis	163 (3.41%)	ko00940
48	Stilbenoid, diarylheptanoid and gingerol biosynthesis	24 (0.50%)	ko00945
49	Tropane, piperidine and pyridine alkaloid biosynthesis	25 (0.52%)	ko00960
Carbohydrate metabolism
50	Amino sugar and nucleotide sugar metabolism	134 (2.80%)	ko00520
51	Ascorbate and aldarate metabolism	40 (0.84%)	ko00053
52	Butanoate metabolism	22 (0.46%)	ko00650
53	C5-Branched dibasic acid metabolism	7 (0.15%）	ko00660
54	Citrate cycle (TCA cycle)	53 (1.11%)	ko00020
55	Fructose and mannose metabolism	73 (1.53%)	ko00051
56	Galactose metabolism	47 (0.98%)	ko00052
57	Glycolysis/Gluconeogenesis	145 (3.03%)	ko00010
58	Glyoxylate and dicarboxylate metabolism	68 (1.42%)	ko00630
59	Inositol phosphate metabolism	54 (1.13%)	ko00562
60	Pentose and glucuronate interconversions	79 (1.65%)	ko00040
61	Pentose phosphate pathway	60 (1.25%)	ko00030
62	Propanoate metabolism	34 (0.71%)	ko00640
63	Pyruvate metabolism	100 (2.09%)	ko00620
64	Starch and sucrose metabolism	233 (4.87%)	ko00500
Energy metabolism
65	Carbon fixation in photosynthetic organisms	65 (1.36%)	ko00710
66	Nitrogen metabolism	38 (0.79%)	ko00910
67	Oxidative phosphorylation	127 (2.65%)	ko00190
68	Photosynthesis	66 (1.38%)	ko00195
69	Photosynthesis-antenna proteins	17 (0.36%)	ko00196
70	Sulfur metabolism	29 (0.61%)	ko00920
Global and overview maps
71	2-Oxocarboxylic acid metabolism	52 (1.09%)	ko01210
72	Biosynthesis of amino acids	230 (4.81%)	ko01230
73	Carbon metabolism	254 (5.31%)	ko01200
74	Fatty acid metabolism	83 (1.73%)	ko01212
Glycan biosynthesis and metabolism
75	Glycosaminoglycan degradation	26 (0.54%)	ko00531
76	Glycosphingolipid biosynthesis-globo series	10 (0.21%)	ko00603
77	N-Glycan biosynthesis	52（1.09%）	ko00510
78	Other glycan degradation	25（0.52%）	ko00511
79	Other types of O-glycan biosynthesis	5（0.10%）	ko00514
Lipid metabolism
80	Arachidonic acid metabolism	17 (0.36%)	ko00590
81	Biosynthesis of unsaturated fatty acids	32 (0.67%)	ko01040
82	Cutin, suberine and wax biosynthesis	26 (0.54%)	ko00073
83	Ether lipid metabolism	28 (0.59%)	ko00565
84	Fatty acid biosynthesis	49 (1.02%)	ko00061
85	Fatty acid degradation	62 (1.30%)	ko00071
86	Fatty acid elongation	30 (0.63%)	ko00062
87	Glycerolipid metabolism	70 (1.46%)	ko00561
88	Glycerophospholipid metabolism	93 (1.93%)	ko00564
89	Linoleic acid metabolism	15 (0.31%)	ko00591
90	Sphingolipid metabolism	36 (0.75%)	ko00600
91	Steroid biosynthesis	31 (0.65%)	ko00100
92	Synthesis and degradation of ketone bodies	12 (0.25%)	ko00072
93	alpha-Linolenic acid metabolism	65 (1.36%)	ko00592
Metabolism of cofactors and vitamins
94	Biotin metabolism	21 (0.44%)	ko00780
95	Folate biosynthesis	19 (0.40%)	ko00790
96	Lipoic acid metabolism	4 (0.08%)	ko00785
97	Nicotinate and nicotinamide metabolism	22 (0.46%)	ko00760
98	One carbon pool by folate	23 (0.48%)	ko00670
99	Pantothenate and CoA biosynthesis	28 (0.59%)	ko00770
100	Porphyrin and chlorophyll metabolism	43 (0.90%)	ko00860
101	Riboflavin metabolism	10 (0.21%)	ko00740
102	Thiamine metabolism	13 (0.27%)	ko00730
103	Ubiquinone and other terpenoid-quinone biosynthesis	46 (0.96%)	ko00130
104	Vitamin B6 metabolism	12 (0.25%)	ko00750
Metabolism of other amino acids
105	Cyanoamino acid metabolism	51 (1.07%)	ko00460
106	Glutathione metabolism	87 (1.82%)	ko00480
107	Selenocompound metabolism	17 (0.36%)	ko00450
108	Taurine and hypotaurine metabolism	11 (0.23%)	ko00430
109	beta-Alanine metabolism	45 (0.94%)	ko00410
Metabolism of terpenoids and polyketides
110	Brassinosteroid biosynthesis	23 (0.48%)	ko00905
111	Carotenoid biosynthesis	39 (0.81%)	ko00906
112	Diterpenoid biosynthesis	30 (0.63%)	ko00904
113	Limonene and pinene degradation	1 (0.02%)	ko00903
114	Sesquiterpenoid and triterpenoid biosynthesis	10 (0.21%)	ko00909
115	Terpenoid backbone biosynthesis	56 (1.17%)	ko00900
116	Zeatin biosynthesis	25 (0.52%)	ko00908
Nucleotide metabolism
117	Purine metabolism	193 (4.03%)	ko00230
118	Pyrimidine metabolism	146 (3.05%)	ko00240
Organismal systems
Environmental adaptation
119	Circadian rhythm-plant	47 (0.98%)	ko04712
120	Plant-pathogen interaction	164 (3.43%)	ko04626
